## RESEARCH ARTICLE

## Diversity of lithophytic moss species in karst regions in response to elevation gradients

Yalin Jin , Xiurong Wang\*

College of Forestry, Guizhou University, Guiyang, Guizhou, China

\* [xrwang@gzu.edu.cn](mailto:xrwang@gzu.edu.cn)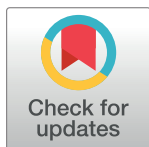

## Abstract

The distribution pattern of species diversity along various elevation gradients reflects the biological and ecological characteristics of species, distribution status and adaptability to the environment. Altitude, a comprehensive ecological factor, affects the spatial distribution of species diversity in plant communities by causing integrated changes in light, temperature, water and soil factors. In Guiyang City, we studied the species diversity of lithophytic mosses and the relationships between species and environmental factors. The results showed that: (1) There were 52 species of bryophytes in 26 genera and 13 families within the study area. The dominant families were *Brachytheciaceae*, *Hypnaceae* and *Thuidiaceae*. The dominant genera were *Brachythecium*, *Hypnum*, *Eurhynchium*, *Thuidium*, *Anomodon* and *Plagiomnium*; The dominant species were *Eurohypnum leptothallum*, *Brachythecium salebrosum*, *Brachythecium pendulum* etc. The number of family species and dominant family genera increased first and then decreased with the increase of altitude, and their distribution in elevation gradient III (1334–1515m) was the largest, with 8 families, 13 genera and 21 species. The elevation gradient I (970–1151m) was the least species distributed, with 5 families, 10 genera and 14 species. The dominant species with the largest number in each elevational gradient were *Eurohypnum leptothallum*, *Brachythecium pendulum*, *Brachythecium salebrosum* and *Entodon prorepens*; (2) There were five kinds of life forms in different elevation gradients, including Wefts, Turfs, Mat, Pendants and Tail. Among them, wefts and turfs appeared in all elevations, while a small amount of Pendants appeared in the area of elevational gradient I (970–1151m), and the most abundant life form was found in the range of elevational gradient III (1334–1515m); (3) Patrick richness index and Shannon-Wiener diversity index were highly significantly ( $p < 0.01$ ) positively correlated, both of which increased and then decreased with elevation, reaching a maximum at elevation gradient III (1334–1515m); The Simpson dominance index had a highly significant ( $p < 0.01$ ) negative correlation with the Patrick richness index and the Shannon-Wiener diversity index, which showed a decreasing and then increasing trend with increasing altitude; Pielou evenness index showed no discernible trend; (4)  $\beta$  diversity study revealed that while the similarity coefficient tended to decrease with increasing altitude, the species composition of bryophytes increased. The elevation gradient II (1151–1332m) and elevation gradient I (970–1151m) shared the most similarities, whereas elevation gradient III (1515–1694m) and elevation gradient I shared the least similarities (970–1151m). The findings can enrich the theory of the distribution pattern of lithophytic moss species diversity at distinct elevation

## OPEN ACCESS

**Citation:** Jin Y, Wang X (2023) Diversity of lithophytic moss species in karst regions in response to elevation gradients. PLoS ONE 18(6): e0286722. <https://doi.org/10.1371/journal.pone.0286722>

**Editor:** Ying Ma, Universidade de Coimbra, PORTUGAL

**Received:** December 27, 2022

**Accepted:** May 19, 2023

**Published:** June 30, 2023

**Peer Review History:** PLOS recognizes the benefits of transparency in the peer review process; therefore, we enable the publication of all of the content of peer review and author responses alongside final, published articles. The editorial history of this article is available here: <https://doi.org/10.1371/journal.pone.0286722>

**Copyright:** © 2023 Jin, Wang. This is an open access article distributed under the terms of the [Creative Commons Attribution License](https://creativecommons.org/licenses/by/4.0/), which permits unrestricted use, distribution, and reproduction in any medium, provided the original author and source are credited.

**Data Availability Statement:** All minimal data files are available from the figshare database (DOI: [10.6084/m9.figshare.22430557](https://doi.org/10.6084/m9.figshare.22430557)).

**Funding:** The author(s) received no specific funding for this work.

**Competing interests:** The authors have declared that no competing interests exist.

gradients in karst regions, and serve a scientific and reasonable reference for restoring rocky desertification and protecting biodiversity there.

## 1. Introduction

Research on biodiversity is crucial for the preservation of species [1]. Plant diversity research plays an important role in stabilizing natural ecosystems [2]. Low plant diversity can make vegetation system vulnerable to damage and affect the stability of ecosystem [3]. The higher the plant diversity, the higher the ecosystem stability [4]. Mosses are rich in species and second only to angiosperms among higher plants [5]. They are exceptionally drought-resistant and contribute significantly to the maintenance of biodiversity, water balance, allelopathic chemicals, soil and water conservation, ecological restoration and headwater conservation [6–11]. Lithophytic mosses, which swiftly absorb water and store a lot of it, are one of them. They formulate a biological microenvironment by releasing organic acids and other components that speed up the breakdown of the rock surface. This promotes the succession of vegetation, reduces the exposed area of the rock and improves the species diversity of lithophyte growing environment [12–17]. Therefore, understanding the distribution and status of lithophytic moss plants is important for the conservation of lithophyte species diversity and sustainable improvement of ecological context.

Altitude affects the spatial distribution of species diversity in plant communities as a whole by causing integrated changes in light, temperature, water and soil factors [18–20]. The relationship between plant species richness and altitude gradient is often hump-shaped, and the peak of plant diversity appears at the medium altitude, where the temperature and rainfall conditions are the best [21, 22]. Another common phenomenon is that species richness shows a monotonously decreasing trend with the increase of altitude, while there are few studies on species richness increasing monotonously with the increase of altitude or no obvious trend [23]. The pattern of species diversity distribution along various elevations reflects the biological and ecological traits of species, their distribution status and environmental suitability [24–26]. Elevation has a substantial impact on changes in moss species diversity, biomass, and water-holding capacity [27–29]. The diversity of moss species increased significantly with altitude, especially at high altitudes [30]. The species diversity of lithophytic mosses in nature reserves, islands, lava flow, parks and steep mountains with wide variations in elevation gradients has received the majority of attention in previous research [31–38], but urban areas received less attention.

Guiyang is a typical karst city in the world's largest continuous karst belt with a potential rocky desertification and rocky desertification area that makes up 50.65% of the city's total land area [39]. The dominant families of moss plants in karst rocky desertification area are *Bryaceae*, *Pottiaceae*, *Brachytheciaceae*, *Hypnaceae*, *Thuidiaceae* and *Entodontaceae*, and the dominant species are *Bryum caespitium*, *Eurohypnum leptothallum* and *Thuidium tamariscinum* etc [35, 36, 40, 41]. Current study on moss species diversity in karst areas focuses on the quantity and distribution of moss plant species in urban areas, urban walls and roadside slopes [42–44]. Huaxi district is where Guiyang city's highest and lowest elevation is found (970m–1697m above sea level). There are many mosses in this district, such as common ones as the *Eurhynchium* and *Pottia* [45], etc. Strengthening the study of lithophytic mosses in Guiyang City can provide scientific support for the management of rocky desertification. Little research has been reported on the relationship between species diversity of lithophytic mosses and elevation in karst areas, therefore, this paper selects the Huaxi district as the study area, and

studies the lithophytic moss communities at different elevation gradients in the region in order to explore the following questions: (1) Species composition, dominant family species and life type of bryophyte communities on distinct elevation gradients; (2) What is the pattern of moss species diversity distribution over the gradient of elevation? (3) What are the key factors affecting these distributions?

## 2. Study area and methods

### 2.1 Overview of the study area

Guiyang is situated in the midst of the mountain plain and hills, and is an important central city in southwest China, a typical karst area. Huaxi District of Guiyang City (26°11'~26°34'N, 106°27'~106°52'E) was chosen for this study, which has high topography in the southwest and low in the northeast, as well as a wide range of altitudes (970–1697m). It is a subtropical humid climate with an annual average temperature of 15.7°C, annual precipitation of 1215.7mm, annual sunshine hours of 1162.6h and frost-free period of 339d. The main forest vegetation types include moist evergreen oak forests, mixed evergreen–deciduous forests and masson pine forests, etc [46].

### 2.2 Data sources and processing

The geographic elevation data (DEM) of the research region was obtained from Geospatial Data Cloud (<http://www.gscloud.cn/>), and using ArcGIS 10.7 independently to extract the study area's elevation. It could be seen that the Huaxi area's elevation was between 970 and 1697 meters, and was divided it into four gradients based on equal elevation intervals: I (970–1151 meters), II (1152–1333 meters), III (1334–1515 meters), and IIII (1516–1697 meters). Three representative community areas were selected in each elevation gradient to set up sample plots, 12 sample plots in total, which were numbered according to the elevation gradient (Fig 1 and Table 1). Two 10m×10m sample squares were selected for investigation in each sample plot, with a total of 24 sample squares, each of which was again divided into three middle sample squares (2m×2m) to collect lithophytic mosses. According to the community minimum area method, within each medium sample square, five small sample squares (10cm×10cm) were identified using metal frames according to the 5-point sampling method in order to sample and record their cover, habitat, life type, collection number and collection time, and a total of 360 samples were collected. The 360 samples were morphologically observed and identified. The methods were as follows: The morphology of the specimens was observed by the classical morphological method with the help of HWG-1 dissecting microscope and XSZ-107TS optical microscope, and the morphological observation and identification of the specimens were carried out with reference to “the Species Catalogue of China”, “Volume 1 Plants”, “Volumes 1–8 of Flora Bryophytorum Sinicorum” and “Volumes 1–3 of Bryophyte Flora of Guizhou China”, etc. The specimens were stored in the bryophyte herbarium of the College of Forestry, Guizhou University. Statistics on the life types of bryophytes in different altitudinal gradients according to Magdefra's concept and distinction system [47].

### 2.3 Research methods

#### 2.3.1 $\alpha$ diversity index.

1. Patrick richness index indicates the richness of the plant community [48] and is calculated as follows:

$$D = S \quad (1)$$

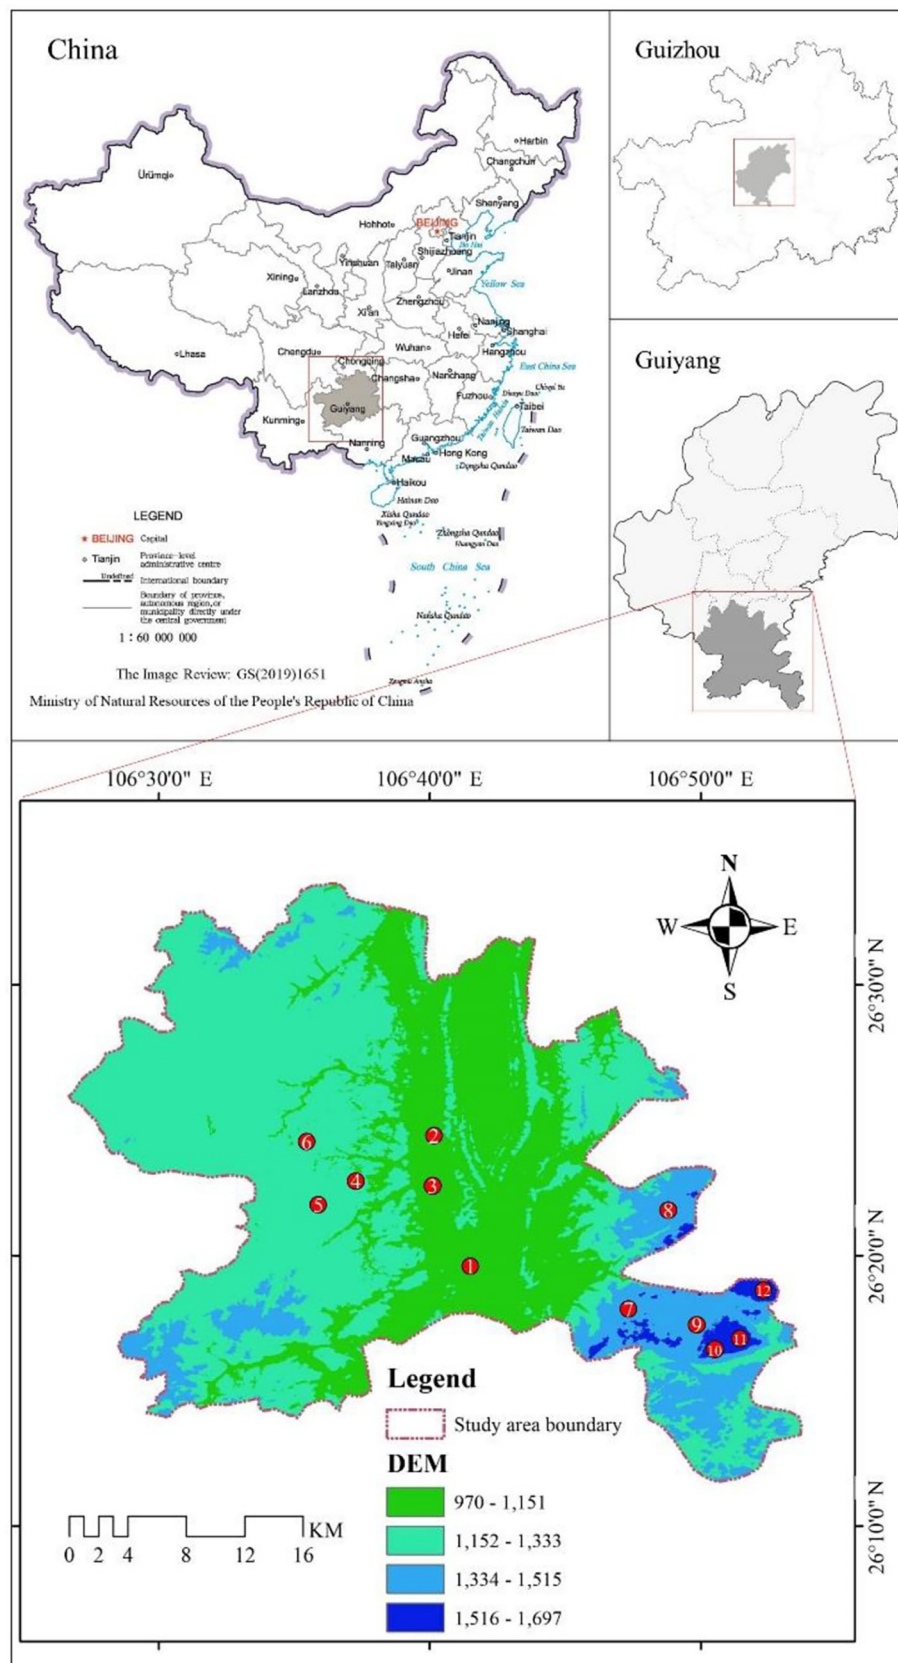

**Fig 1. Schematic diagram and plot layout of Huaxi district.**

<https://doi.org/10.1371/journal.pone.0286722.g001>

**Table 1. Basic information of the sample site.**

| P-N   | E      | S-S                                         | H                                         | A                | C-D (%) | V-C (%) | C-C(%) | S-C(%) | H-C(%) |
|-------|--------|---------------------------------------------|-------------------------------------------|------------------|---------|---------|--------|--------|--------|
| I-1   | 1049.3 | Qingyan Ancient Town                        | Covered only with moss                    | Semi-sunny slope | 0.05    | 20      | 10     | 5      | 30     |
| I-2   | 1103.2 | Huaxi Park                                  | Moss covered with herbs, shrubs and trees | Shady slope      | 0.85    | 95      | 95     | 20     | 30     |
| I-3   | 1151.4 | Xishan Yujing Community                     | Moss covered with herbs, shrubs and trees | Semi-shady slope | 0.85    | 80      | 70     | 50     | 90     |
| II-1  | 1201.2 | Guizhou Normal University                   | Moss covered with herbs, shrubs and trees | Semi-sunny slope | 0.65    | 70      | 60     | 80     | 40     |
| II-2  | 1250.9 | Guizhou University of Finance and Economics | Moss covered with herbs, shrubs and trees | Semi-sunny slope | 0.5     | 60      | 40     | 30     | 80     |
| II-3  | 1302.4 | Tianhe Lake                                 | Moss covered with herbs, shrubs and trees | Sunny slope      | 0.9     | 90      | 85     | 20     | 90     |
| III-1 | 1351.3 | Qiantao Canyon                              | Moss covered with herbs, shrubs and trees | Sunny slope      | 0.98    | 95      | 90     | 30     | 90     |
| III-2 | 1401.5 | Gusa Mountain Park                          | Covered only with moss                    | Semi-shady slope | 0.02    | 60      | 0      | 0      | 20     |
| III-3 | 1451.6 | Gao Po Ethnic Middle School                 | Mosses and shrubs and herbs               | Shady slope      | 0.66    | 95      | 45     | 70     | 80     |
| III-1 | 1516.6 | Yunding Skiing Grassland                    | Mosses and shrubs and herbs               | Sunny slope      | 0.2     | 20      | 0      | 0      | 60     |
| III-2 | 1551.8 | Pingzhai Village                            | Mosses and shrubs and herbs               | Shady slope      | 0.7     | 10      | 0      | 0      | 70     |
| III-3 | 1602.4 | Yunding Grassland                           | Mosses and shrubs and herbs               | Semi-sunny slope | 0.05    | 70      | 0      | 0      | 80     |

Note: P-N. Plot number; E. Elevation; S-S. sample site; H. Habitat; A. Aspect; C-D. Canopy density; V-C. Vegetation coverage; C-C. Canopy coverage; S-C. Shrub coverage; H-C. Herb coverage

<https://doi.org/10.1371/journal.pone.0286722.t001>

where  $D$  is the diversity index, bryophyte species richness ( $S$ ) = the number of species of lithophytic moss in different survey sample sites.

- Shannon-Wiener diversity index is a measure of the community diversity and extent of heterogeneity at the species level, which integrates the sum of community species richness and evenness [49], and is calculated as follows:

$$H' = - \sum_{i=1}^s P_i \ln P_i \quad (2)$$

$$P_i = N_i/N \quad (3)$$

Where  $N$  is replaced by the total cover of mosses,  $n_i$  is replaced by the cover of the  $i$ th species,  $H$  is the Shannon-Wiener diversity index,  $P_i$  is the proportion of the  $i$ th species to the total.

- Pielou evenness index reflects the relative density of individual species in the community [50] and is calculated as follows:

$$J = H/\ln S \quad (4)$$

where  $H$  is the Shannon-Wiener diversity index,  $S$  is the number of species in the sample plot.

4. Simpson dominance index reflects the concentration of species distribution [51] and is calculated as follows:

$$\lambda = \sum p_i^2 \quad (5)$$

where  $\lambda$  is the Simpson dominance index,  $P_i$  is the proportion of the  $i$ th species in the total.

**2.3.2  $\beta$  diversity index.**  $\beta$  diversity index refers to the variability of species composition between different habitat communities along an environmental gradient or the turnover rate of species along an environmental gradient. The lower the number of common species among different communities or different points on an altitude gradient, the greater the  $\beta$  diversity [52]. The formula was calculated as follows:

$$\beta w = \frac{s}{ma} - 1 \quad (6)$$

Where  $\beta w$  is  $\beta$  diversity index,  $S$  is the total number of species in the studied system,  $ma$  is the average number of species in each recipe or sample.

**2.3.3 Bryophyte importance value.** Importance value can indicate the roles and functions played by the species in the community, and the high importance value indicates the dominance of the species [53]. The formula is calculated as follows:

$$V = (C + F)/2 \quad (7)$$

where  $V$  is the importance value, relative cover  $C$  = (the cover of a bryophyte within sample site or sum of cover of all bryophytes in the sample site)  $\times$  100%, relative frequency  $F$  = (frequency within a bryophyte sample site or sum of frequency of all bryophytes in the sample site)  $\times$  100%.

### 3. Results and analysis

#### 3.1 Distribution and diversity characteristics of moss family species at different altitudes

There are 52 species of bryophytes in 26 genera and 13 families in the study area (Table 2). The number of family, genus and species gradually increased and then decreased as the altitude rose (Fig 2), and reached the maximum in elevation gradient III (1334-1515m), with 21 species in 8 families and 13 genera. The bryophyte families, genera and species below the altitude of 1152m were the least, with five families, ten genera, and fourteen species of moss.

The dominant families (Number of species contained  $\geq 6$  species) were *Brachytheciaceae* (4 genera and 17 species), *Hypnaceae* (5 genera and 9 species), and *Thuidiaceae* (3 genera and 6 species), with a total of 12 genera and 32 species in the three families, accounting for 61.54% of the total. Three families were distributed throughout the altitude study area (Fig 2), and the number of *Brachytheciaceae* and *Hypnaceae* increased and then decreased with increasing altitude, with the largest number of species distributed in elevation gradient III (1334-1515m), with 9 and 5 species, respectively. The distribution of *Thuidiaceae* was relatively uniform at all altitudes, and there were 2 species.

Six dominant genera (Number of species contained  $\geq 3$  species) were *Brachythecium*, *Hypnum*, *Eurhynchium*, *Thuidium*, *Anomodon*, and *Plagiomnium*, accounted for 51.93% of the total. The genus mainly distributed in elevation gradient III (1334-1515m) (Fig 3), and the distribution was the same as that of the dominant families. The number of species in the *Brachythecium*, *Eurhynchium*, *Thuidium* and *Plagiomnium* increased and then decreased with the increase of altitude, except for the *Anomodon*.



Table 2. Species and genus proportion of bryophytes in Huaxi area.

| Family name      | Genus name                                                                                             | Species name                                                                                                                                                                                                                                                                                                                                                       | Genus (Percentage of total genus /%) | Species (percentage of total species /%)    |
|------------------|--------------------------------------------------------------------------------------------------------|--------------------------------------------------------------------------------------------------------------------------------------------------------------------------------------------------------------------------------------------------------------------------------------------------------------------------------------------------------------------|--------------------------------------|---------------------------------------------|
| Hypnaceae        | <i>Eurohypnum</i> , <i>Homomallium</i> , <i>Taxiphyllum</i> , <i>Pseudotaxiphyllum</i> , <i>Hypnum</i> | <i>E.leptothallum</i> , <i>H.yunnanense</i> , <i>H.plagiongium</i> , <i>T.cuspidifolium</i> , <i>P.densum</i> , <i>P.pohliaecarpum</i> , <i>H.calcicolum</i> , <i>H.hamulosum</i> , <i>H.cupressiforme</i>                                                                                                                                                         | 5(19.23)                             | 1(1.92), 2(3.85), 1(1.92), 2(3.85), 3(5.77) |
| Pottiaceae       | <i>Hyophila</i> , <i>Didymodon</i> , <i>Tortella</i> , <i>Weissia</i>                                  | <i>H.involuta</i> , <i>D.ditrichoides</i> , <i>T.tortuosa</i> , <i>W.exserta</i>                                                                                                                                                                                                                                                                                   | 4(15.38)                             | 1(1.92), 1(1.92), 1(1.92), 1(1.92)          |
| Leucodontaceae   | <i>Pterogoniadelphus</i>                                                                               | <i>P.esquirolii</i>                                                                                                                                                                                                                                                                                                                                                | 1(3.85)                              | 1(1.92)                                     |
| Brachytheciaceae | <i>Brachythecium</i> , <i>Eurhynchium</i> , <i>Homalothecium</i> , <i>Rhynchostegium</i>               | <i>B.amnicolum</i> , <i>B.pendulum</i> , <i>B.garavaglioides</i> , <i>B.albicans</i> , <i>B.salebrosum</i> , <i>B.oedipodium</i> , <i>B.coreanum</i> , <i>B.populeum</i> , <i>B.helminthocladum</i> , <i>B.plumosum</i> , <i>B.kuroishicum</i> , <i>E.longirameum</i> , <i>E.angustirete</i> , <i>E.laxirete</i> , <i>H.leucodonticaule</i> , <i>R.ovalifolium</i> | 4(15.38)                             | 11(21.15), 3(5.77), 1(1.92), 1(1.92)        |
| Thuidiaceae      | <i>Claopodium</i> , <i>Haplocladium</i> , <i>Thuidium</i>                                              | <i>C.aciculums</i> , <i>H.angustifolium</i> , <i>H.microphyllum</i> , <i>T.kanadae</i> , <i>T.delicatulum</i> , <i>T.minutulum</i>                                                                                                                                                                                                                                 | 3(11.54)                             | 1(1.92), 2(3.85), 3(5.77)                   |
| Anomodontaceae   | <i>Anomodon</i> , <i>Herpetineuron</i>                                                                 | <i>A.perlingulatus</i> , <i>A.viculosus</i> , <i>A.rugelii</i> , <i>H.toccoae</i>                                                                                                                                                                                                                                                                                  | 2(7.69)                              | 3(5.77), 1(1.92)                            |
| Racopilaceae     | <i>Racopilum</i>                                                                                       | <i>R.cuspidigerum</i>                                                                                                                                                                                                                                                                                                                                              | 1(3.85)                              | 1(1.92)                                     |
| Mniaceae         | <i>Plagiomnium</i>                                                                                     | <i>P.acutum</i> , <i>P.succulentum</i> , <i>P.maximoviczii</i>                                                                                                                                                                                                                                                                                                     | 1(3.85)                              | 3(5.77)                                     |
| Meteoriaceae     | <i>Meteorium</i>                                                                                       | <i>M.subpolytrichum</i>                                                                                                                                                                                                                                                                                                                                            | 1(3.85)                              | 1(1.92)                                     |
| Bryaceae         | <i>Bryum</i>                                                                                           | <i>B.dichotomum</i> , <i>B.calophyllum</i> , <i>B.pseudotriquetrum</i>                                                                                                                                                                                                                                                                                             | 1(3.85)                              | 3(5.77)                                     |
| Trachypodaceae   | <i>Trachypus</i>                                                                                       | <i>T.bicolor</i>                                                                                                                                                                                                                                                                                                                                                   | 1(3.85)                              | 1(1.92)                                     |
| Dicranaceae      | <i>Campylopus</i>                                                                                      | <i>C.gracilis</i> , <i>C.atrovirens</i>                                                                                                                                                                                                                                                                                                                            | 1(3.85)                              | 2(3.85)                                     |
| Entodontaceae    | <i>Entodon</i>                                                                                         | <i>E.prorepens</i>                                                                                                                                                                                                                                                                                                                                                 | 1(3.85)                              | 1(1.92)                                     |

<https://doi.org/10.1371/journal.pone.0286722.t002>

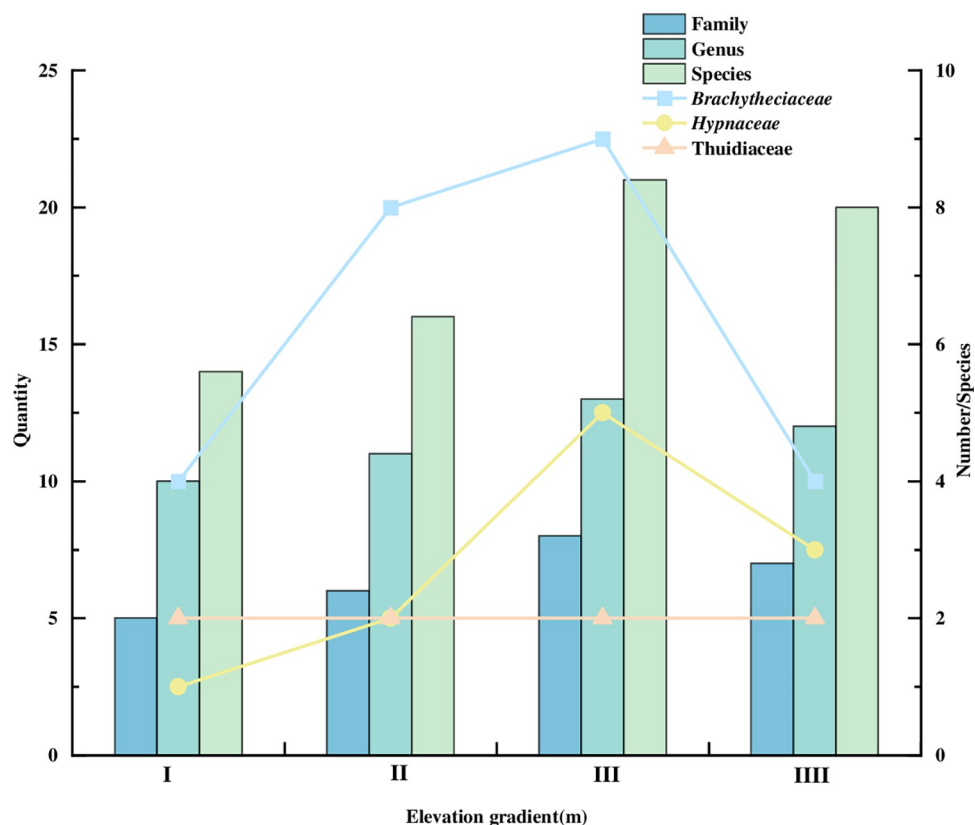

Fig 2. Distribution of species and dominant families at different elevation gradients.

<https://doi.org/10.1371/journal.pone.0286722.g002>

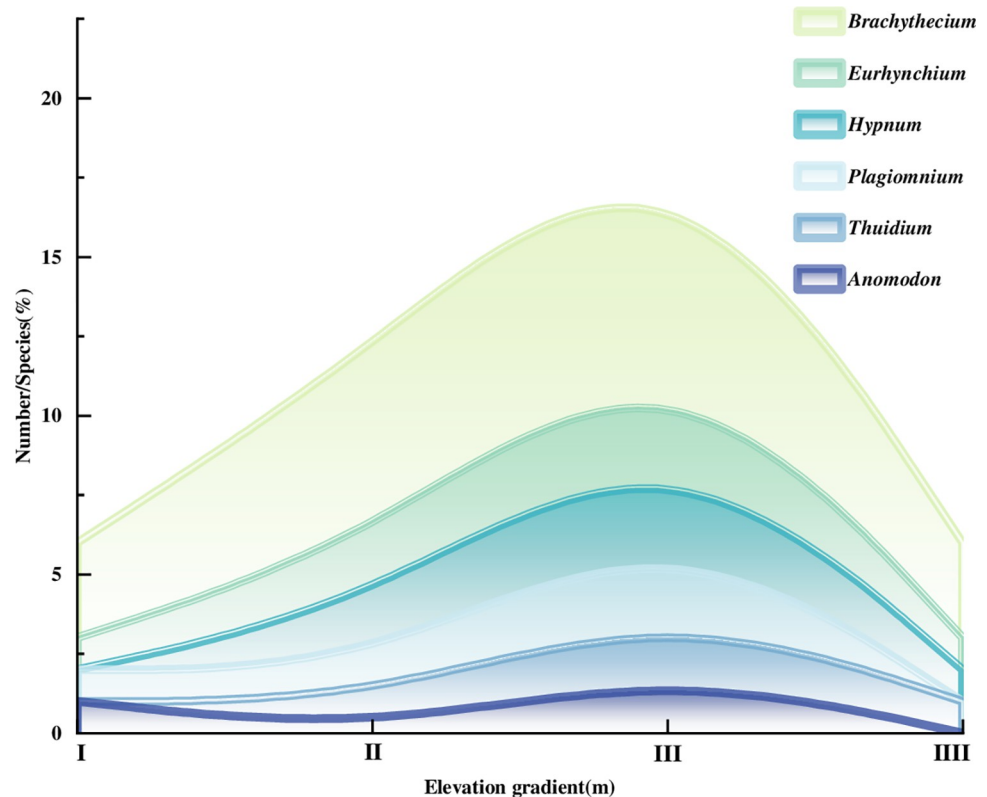

Fig 3. Vertical distribution of dominant bryophyte genera.

<https://doi.org/10.1371/journal.pone.0286722.g003>

### 3.2 Important value of bryophyte communities at different altitudes

Among the 52 bryophytes, the top ten ranked by importance value were shown in Table 3. the largest importance value of 0.1906 ( $p < 0.01$ ) was found for *Eurohypnum leptothallum*, which was highly significant different from that of other bryophytes, and its frequency (18.33%) and cover (19.79%) were also the largest. The distribution of dominant species at different altitudes was shown in Fig 4. It could be seen that the *Eurohypnum leptothallum* was the main dominant species, reaching its highest and second highest peaks at elevation gradient I (970–1151m) and elevation gradient III (1334–1515m), respectively. The dominant species with the highest frequency in each elevation gradient were *Eurohypnum leptothallum*, *Brachythecium pendulum*, *Brachythecium salebrosum* and *Entodon prorepens*. Among them, the number of *Entodon prorepens* gradually increased with the elevation, while the frequency of other bryophytes was less distributed in the elevation IIII section.

### 3.3 Life form composition of moss plants at different altitudes

There were five life forms at different elevation gradients, such as wefts, turfs, mat, pendants and tail, among which the average percentage of Wefts were 73%, for example, *Eurohypnum leptothallum*, *Brachythecium amnicolum*, etc, followed by turfs, the average percentage were 15%, for example, *Hyophila involuta*, *Didymodon ditrichoides*, etc. Mat, Pendants and Tail were the least, with an average of 6%, 4% and 2%, respectively, such as *Plagiomnium succulentum*, *Pterogoniadelphus esquirolii* and *Herpetineuron toccoeae*. The life forms of different elevation gradients also differed (Fig 5), with wefts and turfs occurred in all elevation gradients, but pendants occurred only in small amounts in the range of elevation gradient I (970–1151m),



Table 3. Ranking of important values of bryophytes.

| serial number | Genus name                          | relative frequency | relative coverage | importance value |
|---------------|-------------------------------------|--------------------|-------------------|------------------|
| 1             | <i>Eurohypnum leptothallum</i>      | 18.33%             | 19.79%            | 0.1906           |
| 2             | <i>Brachythecium salebrosum</i>     | 6.67%              | 7.61%             | 0.0714           |
| 3             | <i>Brachythecium pendulum</i>       | 5.83%              | 5.26%             | 0.0555           |
| 4             | <i>Brachythecium amnicolum</i>      | 5.00%              | 5.59%             | 0.0530           |
| 5             | <i>Hyophila involuta</i>            | 5.56%              | 4.98%             | 0.0527           |
| 6             | <i>Entodon prorepens</i>            | 5.56%              | 4.69%             | 0.0512           |
| 7             | <i>Brachythecium garovaglioides</i> | 3.61%              | 4.35%             | 0.0398           |
| 8             | <i>Thuidium delicatulum</i>         | 3.33%              | 3.65%             | 0.0349           |
| 9             | <i>Brachythecium albicans</i>       | 3.06%              | 2.67%             | 0.0286           |
| 10            | <i>Eurhynchium longirameum</i>      | 3.06%              | 2.61%             | 0.0283           |

<https://doi.org/10.1371/journal.pone.0286722.t003>

while at elevation gradient III (1334–1515m), the life types were the most abundant, including wefts, turfs, mat, pendants, and tail.

### 3.4 Characteristics of bryophyte diversity at different elevation gradients

**3.4.1  $\alpha$  diversity and its differences across elevation gradients.** The  $\alpha$  diversity index of bryophytes at various elevation gradients were shown in Fig 6. The trends of Patrick richness index and Shannon-Wiener diversity index were consistent, showing an increasing and then decreasing trend with elevation, as follows: elevation gradient III (33 species, 2.53) > elevation gradient IIII (29 species, 2.52) > elevation gradient II (25 species, 2.4) > elevation gradient I

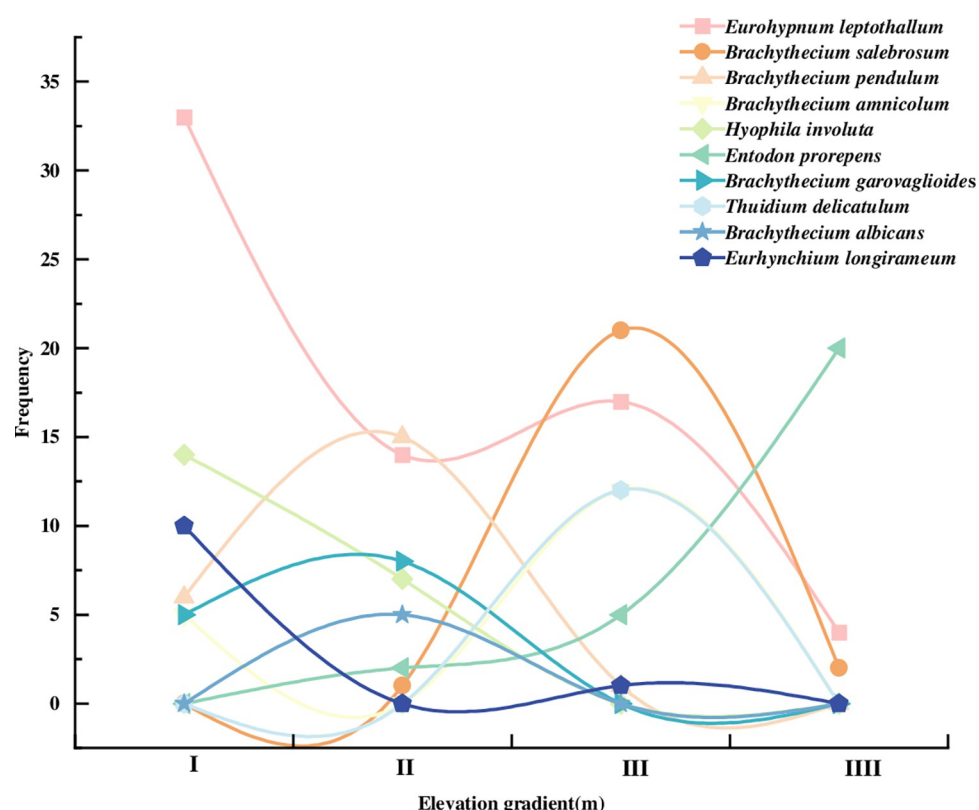

Fig 4. Vertical distribution of dominant bryophyte species.

<https://doi.org/10.1371/journal.pone.0286722.g004>

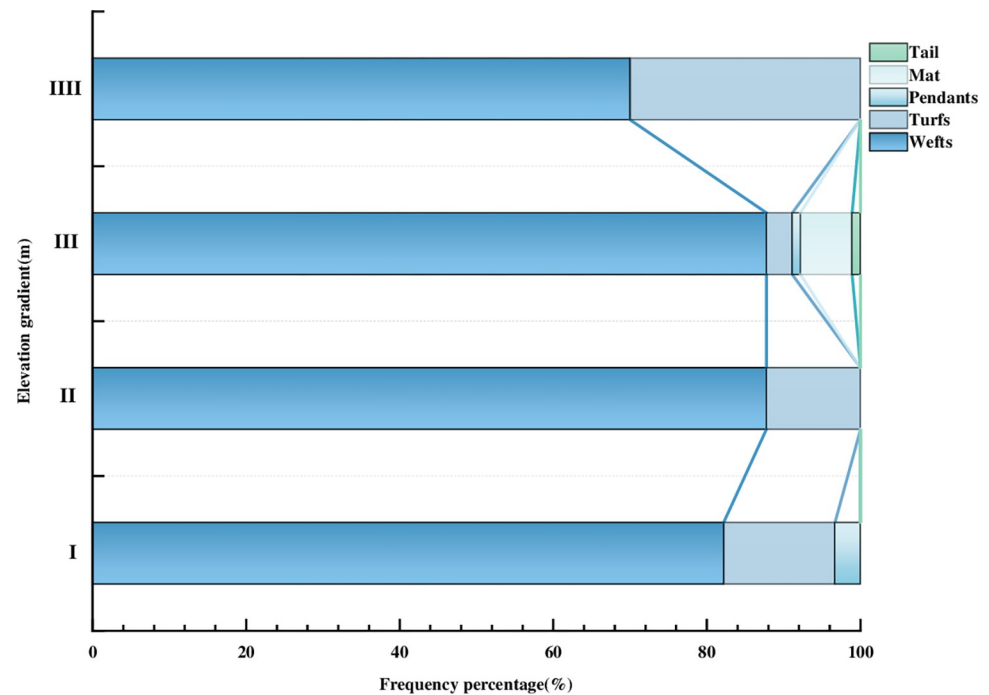

**Fig 5. Life types of species at different altitudes.**

<https://doi.org/10.1371/journal.pone.0286722.g005>

(22 species, 2.13). The trend of Simpson dominance index was opposite to the above two, that was, it first decreased and then increased with the elevation, specifically as follows: Elevation gradient I (0.18) > Elevation gradient II (0.13) > Elevation gradient IIIII (0.11) > Elevation gradient III (0.09). The variation pattern of Pielou evenness index was: elevation gradient II (0.87) > elevation gradient III (0.81) > elevation gradient III and elevation gradient I (0.75). There were significant differences ( $p < 0.05$ ) between the richness, diversity and dominance indices of elevation gradient III (1334–1515m) and the other three gradients.

In summary, Patrick richness index was lowest at elevation gradient I (970–1151m) and increased with the elevation. The reason might be that at elevation gradient I (970–1151 m), the habitat of bryophytes had low canopy density because there were no mixed tree forests, low shrubs, or herbaceous plants. However, as elevation increased, the air humidity and canopy density increased significantly, Patrick richness index also increased. The differences of Pielou evenness index were not significant, indicating that different elevation gradient had little effect on the individual evenness of the species.

The correlation between  $\alpha$  diversity index and environmental factors showed (Fig 7) that both Patrick richness index and Shannon-Wiener diversity index had highly significant ( $p < 0.01$ ) positive correlations with altitude and air humidity, and highly significant ( $p < 0.01$ ) negative correlations with air temperature. There was a highly significant ( $p < 0.01$ ) positive correlation between Simpson dominance index and air temperature with a correlation coefficient of 0.898, and a highly significant ( $p < 0.01$ ) negative correlation with altitude and air humidity with correlation coefficients of -0.799 and -0.792, respectively. Correlations between environmental factors of different elevation gradients showed a highly significant ( $p < 0.01$ ) positive correlation between altitude and air humidity and a highly significant ( $p < 0.01$ ) negative correlation with air temperature. There was a highly significant ( $p < 0.01$ ) positive correlation between slope orientation and light intensity, and a highly significant ( $p < 0.01$ ) negative correlation between canopy density and tree cover. It could be seen that the environmental

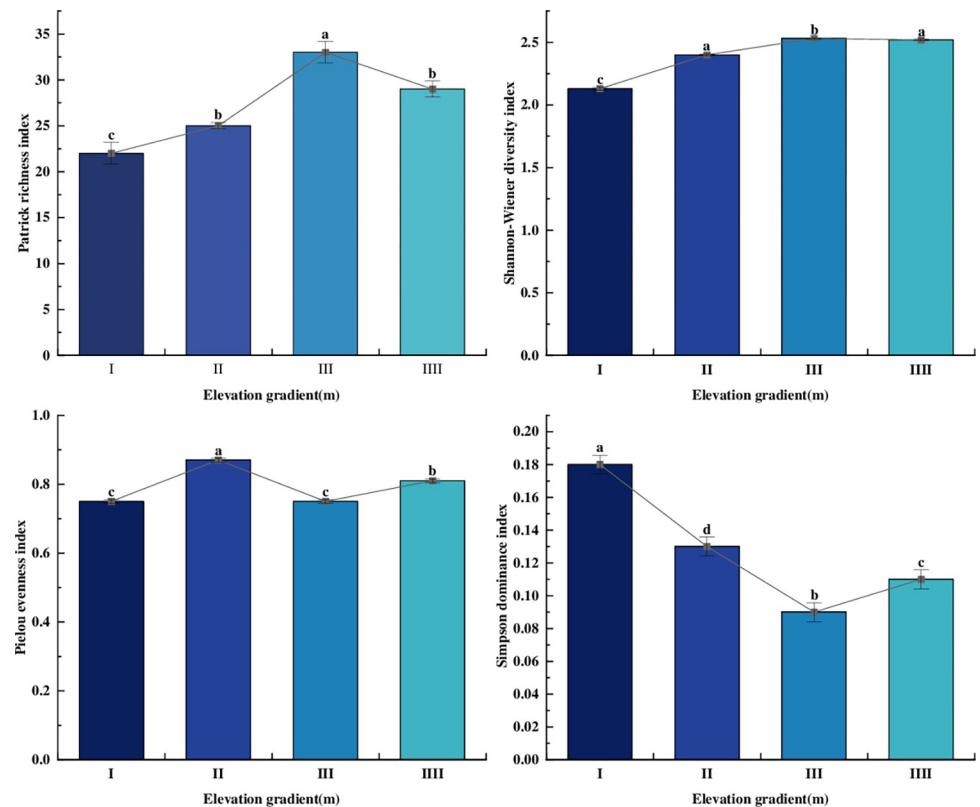

Fig 6. Effects of altitude  $\alpha$  diversity index.

<https://doi.org/10.1371/journal.pone.0286722.g006>

factors affecting species diversity were mainly elevation, air humidity, air temperature, and slope direction affected the intensity of light, which led to the difference of air humidity and temperature.

**3.4.2 Trends in  $\beta$  diversity index at different elevation gradients.** The similarity of species composition of moss communities across the elevation gradient was showed in Table 4. With the altitude increased, the similarity coefficient decreased and the difference of bryophyte species composition increased (11.76%–40%). Elevation gradients II (1152–1333 m) and I (970–1151 m) shared the highest similarity of 40%, indicating that they shared a large number of the same moss species. Elevation gradient IIII (1516–1697m) and elevation gradient I (970–1151m) had the lowest similarity coefficient of 11.76%. The reason might be that the air humidity increased as the altitude rose, and the air temperature and the temperature of moss-covered rocks decreased, which was conducive to the growth and variety of moss. However, above elevation gradient III (1334–1515m), the differences of moss species began to increase. The possible reason was that the sample land on gradient IIII(1516–1697) were located in artificial scenic areas, such as Genting Grassland, which had low canopy coverage, almost no tree and only a few shrubs. As a result, the moss plants lacked nutrient elements and favorable environmental conditions for growth, so the species decreased and the similarity coefficient reached the lowest.

## 4. Discussion

### 4.1 Effects of different elevation gradients on the diversity of moss species

As an important component of biodiversity, species diversity primarily reflected the abundance of biological resources, and an increase in species diversity would enhance the stability

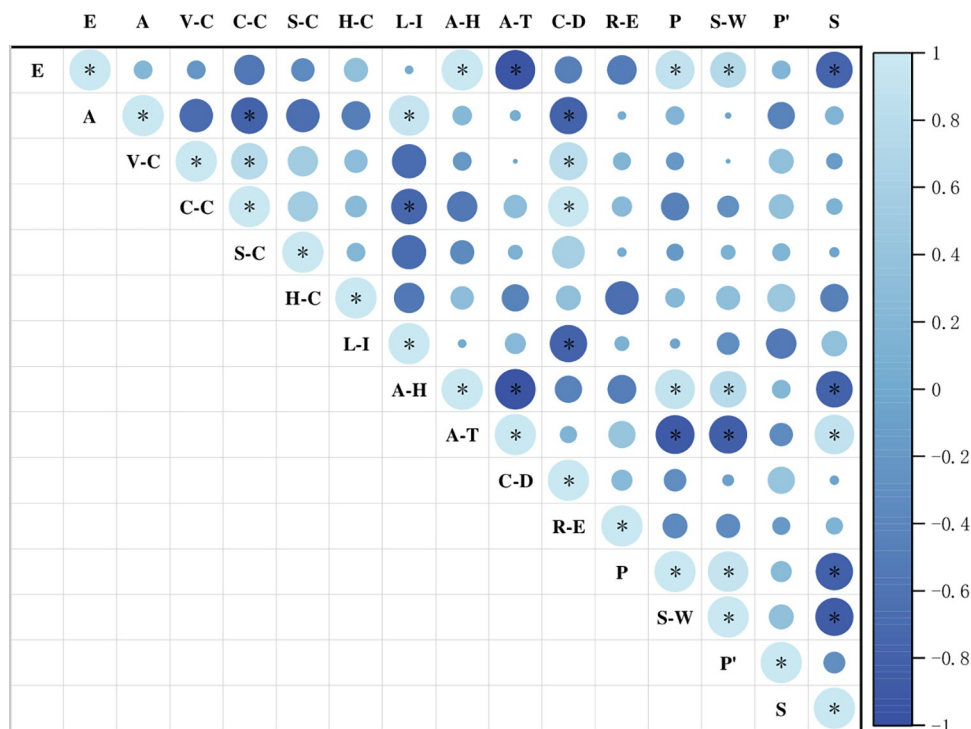

**Fig 7. Pearson correlation analysis of  $\alpha$  diversity index and environmental factors.** Note; \*  $p < 0.05$ ; \*\*  $p < 0.01$ ; E. Elevation; A. Aspect; V-C. Vegetation coverage; C-C. Canopy coverage; S-C. Shrub coverage; H-C. Herb coverage; L-I. Light intensity; A-H. Air humidity; A-T. Air temperature; C-D. Canopy density; R-E. Rock exposure; P. Patrick richness index; S-W. Shannon-Wiener diversity index; P'. Pielou evenness index; S. Simpson dominance index.

<https://doi.org/10.1371/journal.pone.0286722.g007>

and productivity of a community or ecosystem [54]. Previous research had demonstrated that the effects of elevation gradient on variables like temperature, light, soil, and moisture had a significant impact on the composition of species diversity [55, 56].

Firstly, elevation gradient significantly affected the composition and quantity of family and genus [57]. In the elevation gradient of 1400-2200m in the Jiufeng Mountain Nature Reserve, the percentage of bryophyte species increased with the elevation [58]. The number of bryophyte genera and species in Pingding Mountain, the main peak of the Lesser Khingan Mountains, showed two peaks within the elevation gradient 304-1429m [59]. The bryophyte species in the Daba Mountain National Nature Reserve showed a single peak value with the increase of altitude [60]. By studying the distribution of lithophytic moss and the influence of environmental factors on it at different altitude gradients, we found that the number of species, genera and family increased first and then decreased with elevation, which were in line with those of earlier studies [32]. Most habitats in elevation gradient III (1334-1515m) were forest stony habitats with large canopy coverage and low human disturbance, and there were very

**Table 4. Differences of  $\beta$  diversity index at different elevation gradients (%).**

| Elevational gradient (m) | I   | II    | III   | IIII  |
|--------------------------|-----|-------|-------|-------|
| I                        | 100 | 40.00 | 17.14 | 11.76 |
| II                       |     | 100   | 21.62 | 22.22 |
| III                      |     |       | 100   | 19.51 |
| IIII                     |     |       |       | 100   |

<https://doi.org/10.1371/journal.pone.0286722.t004>

abundant moss plant species. In contrast, in elevation gradient IIII (1516–1697m), the increase in light and radiation were not favorable for the growth of moss plants [61], so the number of family, genera and species was low. The innovation of this study was that we selected karst urban areas, where the habitat conditions changed greatly, with typical karst mountain features. However, the previous study objects were mostly bryophytes distributed in the outskirts of the mountain, belonging to the subalpine cold and temperate forests with rich environmental vegetation and large canopy [32]. Our results compensated for the diversity of moss in special habitats and provided a scientific basis for the control of rocky desertification.

Secondly, altitude altered the composition of life form in proportion and impacted its pattern of distribution [62–64]. The Alpine area had a large altitude gradient, and its bryophyte life forms are related in different altitude gradients, namely plagiotropic, cushion-turf, dendroid and thallose forms [65]. Bryophyte species on different substrates were studied along the altitude gradients in Canary Islands. The results showed that bryophyte life forms were most abundant in the higher altitude gradients [66]. Studies on bryophyte life forms under different altitudinal gradients in the southern Appalachian Mountains showed that altitude had a significant effect on bryophyte life forms. Weft, threadlike, tall turf and short turf life forms were strongly correlated with high altitude sites [67]. This study carried out the effect of elevation gradient on life form. It was discovered that there were five different life forms in the study area, including wefts, turfs, mat, pendants and tail, which were gradually enrich as the elevation increased and most abundant in elevation gradient III (1332–1513m). Bryophytes of different life form could reveal the link between plants and the environment and reflect the vertical structure of the community. Their distribution patterns on the altitude gradient could give data to forecast changes in species diversity under climate change [68–70]. Wefts and Turfs occurred in all elevation gradients, which might be due to the fact that both of them could grow on the rock surface, which was consistent with the research results of Zeke Li et al. [71].

At last, elevation gradient was an important environmental factor affecting species  $\alpha$  diversity and  $\beta$  diversity [72]. The  $\alpha$  diversity index reflected the compositional characteristics, abundance and diversity of species within the community [73–75]. According to earlier research, the  $\alpha$  diversity index of bryophytes showed five trends with increasing elevation, such as increasing and then decreasing (bimodal curve), first decreasing followed by increasing, monotonically increasing, monotonically decreasing, increasing followed by decreasing [58, 59, 76–78]. This study found that the Patrick richness and Shannon-Wiener diversity index increased first and then decreased with the increase of altitude. The reason might be that the bryophytes in elevation gradient I (970–1151m) were significantly disturbed by humans, which had an impact on their growth. Additionally, most of the sample sites were exposed habitats that suffered from sunlight exposure, which resulted in fewer bryophytes. With increasing elevation, the habitats of elevation gradient II (1152–1333m) and III (1332–1513m) were covered with a large amount of vegetation, air humidity, canopy coverage and so abundance also showed up as an increase. However, the light intensity at elevation gradient IIII (1516–1697m) increased, which was not conducive to the growth of moss. The  $\beta$  diversity index reflected the response of species composition and diversity among communities to environmental gradients [79]. The current studies on  $\beta$  diversity indices of bryophytes at various altitudinal gradients had mainly explored the altitudinal intervals with the fastest succession rates of bryophytes [80]. There was some uncertainty on the trend of the  $\beta$  diversity index along altitude. In this study, we found that increasing altitude contributed to the decrease of  $\beta$  diversity index of bryophytes and the increase of species composition differences and succession rate. The distribution pattern of moss species diversity along the elevation gradient of Guiyang city was first increasing and then decreasing (single-peaked curve), which was consistent with the results of

one of the previous studies. This study intends to further investigate the effect of pollution on mosses distribution in urban areas based on further data collection.

## 4.2 Limitations and outlook

The study on the diversity of moss species at various elevation gradients in karst areas will clarify the relationship between species diversity and elevation, provide a theoretical source for understanding conditions of species to the altitude and a scientific basis for the conservation and management of rocky desertification, so as to strengthen the conservation of biodiversity in karst areas accordingly. However, this study still had the following limitations. First of all, in this study, portable instruments were used to record environmental factors such as air temperature and air humidity at the sample sites during field research, and only transient data were collected. However, air temperature and humidity are dynamic. Future recording of the dynamic processes of environmental factors will provide a clearer understanding of the factors affecting species diversity at elevation. Secondly, rainfall, solar radiation and canopy action also have a strong influence on abundance [81–83], for example, high temperatures at low elevations can be cooled by high rainfall, and high solar radiation at high elevations can be mitigated by canopy. Although there were changes in light caused by solar radiation and depression from the action of the canopy, the influence of precipitation was not taken into account in the study area, and the specific internal factors affecting richness were not examined in greater detail. Future research taking into account rainfall and other factors will provide stronger evidence for changes in species diversity caused by elevation. Of course, bryophyte distribution in urban areas is not only affected by altitude, but also by heavy metal pollution, human disturbance, urban management, etc [84].

## 5. Conclusion

1. There were 13 families, 26 genera, and 52 species of lithophytic mosses in different altitude gradients in Guiyang City. The number of family, genera, species and dominant family and genera gradually increased and then decreased with elevation, reached the maximum in gradient III (1334–1515m). The dominant families were *Brachytheciaceae*, *Hypnaceae* and *Thuidiaceae*, and the dominant genera were *Brachythecium*, *Hypnum*, *Eurhynchium*, *Thuidium*, *Anomodon* and *Plagiomnium*.
2. There were five different life forms: wefts, turfs, mat, pendants and tail. Wefts and Turfs could be found in all gradients of altitude. Life type gradually became more diverse as altitude rises, and they were the most abundant in gradient altitude III (1334–1515m). There were only a small amount of pendants appeared at elevation gradient I (970–1151m).
3. Both Patrick richness and Shannon-Wiener diversity index showed a trend of increasing and then decreasing with the altitude, reached a maximum at elevation gradient III (1334–1515m) and a minimum at elevation gradient I (1334–1515m). The change of Simpson dominance index was generally opposite to the change of the above two indices, showing a decreasing trend followed by an increasing trend, and the difference of Pielou uniformity index was not significant.
4. The distribution pattern of moss species diversity along the elevation gradient in Guiyang City was first increasing and then decreasing (single-peaked curve).



## Author Contributions

**Data curation:** Yalin Jin.

**Formal analysis:** Yalin Jin.

**Funding acquisition:** Xiurong Wang.

**Investigation:** Yalin Jin.

**Methodology:** Yalin Jin.

**Project administration:** Yalin Jin.

**Software:** Yalin Jin.

**Writing – original draft:** Yalin Jin.

**Writing – review & editing:** Xiurong Wang.

## References

1. Tordoni E, Napolitano R, Nimis P, Castello M, Altobelli A, Daniele D, et al. Diversity patterns of alien and native plant species in Trieste port area: exploring the role of urban habitats in biodiversity conservation. *Urban Ecosystems*. 2017; 20: 1151–1160. <https://doi.org/10.1007/s11252-017-0667-0>
2. Corlett RT. Plant diversity in a changing world: Status, trends, and conservation needs. *Plant Diversity*. 2016; 38(1): 10–16. <https://doi.org/10.1016/j.pld.2016.01.001> PMID: 30159445
3. Valentin N, Andrey A, Alexander A, Alexander B. Taxonomic and functional patterns of macrobenthic communities on a high Arctic shelf: A case study from the East Siberian Sea. *Journal of Sea Research*. 2021; 174: 1385–1101. <https://doi.org/10.1016/j.seares.2021.102078>
4. Tilman D, Reich PB, Knops JM. Biodiversity and ecosystem stability in a decade-long grassland experiment. *Nature*. 2006; 441(7093): 629–632. <https://doi.org/10.1038/nature04742> PMID: 16738658
5. Patiño J, Vanderpoorten A. Bryophyte Biogeography. *Critical Reviews in Plant Sciences*. 2018; 37(2–3): 175–209. <https://doi.org/10.1080/07352689.2018.1482444>
6. Cong C, Liu T, Zhang X. Influence of Drought Stress and Rehydration on Moisture and Photosynthetic Physiological Changes in Three Epilithic Moss Species in Areas of Karst Rocky Desertification. *Journal of Chemistry*. 2021; 4944012: 12. <https://doi.org/10.1155/2021/4944012>
7. Zuo S, An H, Wang Z. Survey of moss plants and pollution indication study of Karin-type gold mine in Gaofeng Village, Guizhou Province. *Environmental Monitoring in China*. 2019; 035(005): 127–134. <https://doi.org/10.19316/j.issn.1002-6002.2019.05.16>
8. Hong L, Wu L, Mu L. Species and systematics of mosses in Mulinzi National Nature Reserve. *Plant Science Journal*. 2020; 38(1): 68–76. CNKI:SUN:WZXY.0.2020-01-008.
9. Muamar A, Anggraito Y, Retnoningsih A. The diversity of moss in the Cemoro Kandang hiking trail, Mount Lawu and the Baturraden botanical gardens, Central Java. *Journal of Physics: Conference Series*. 2021; 1918: 052039. <https://doi.org/10.1088/1742-6596/1918/5/052039>
10. Meng W, Dai Q, Ren Q, Tu N, Leng T. Ecological stoichiometric characteristics of soil-moss C, N, and P in restoration stages of karst rocky desertification. *PLOS ONE*. 2021; 16(6): e0252838. <https://doi.org/10.1371/journal.pone.0252838> PMID: 34191821
11. Whitehead J, Wittemann M, Cronberg N. Allelopathy in bryophytes—a review. *BioOne*. 2018; 41(1): 01097. <https://doi.org/10.25227/linbg.01097>
12. Tu N, Yan Y, Dai Q, Ren Q, Meng W, Zhu L, et al. Water-holding role of sphagnum mosses in typical habitats of karstic rock desertification areas. *Acta Ecologica Sinica*. 2021; 41(15): 6203–6214. <https://doi.org/10.5846/stxb202006111520>
13. Zhang X, Liu T., Cong C. Study on soil formation and conservation ecological function of five karst Mosses in Guizhou Province. *Carsologica Sinica*. 2018; 37(5): 708–713. <https://doi.org/10.11932/karst2018y18>
14. Zhang P, Ding Z, Hou Y, Bai H, Ren X, Zhao P. Taibai rock moss carbon isotopic distribution characteristics and their environmental implications. *Arid Zone Research*. 2016; 5: 1046–1056. <https://doi.org/10.13866/j.azr.2016.05.19>

15. Liu T, Cong C, Hu D, Wang S, Zhang X. Carbonic anhydrase activity of six karst lithophytic plants and their soils in Puding, Guizhou Province. *Carsologica Sinica*. 2017; 36(2): 187–192. CNKI:SUN: ZGYR.0.2017-02-005.
16. Islam M, Alam J, Fiaz M. Checklist of Lithophytic Mosses of Kaghan Valley, Mansehra-Pakistan. *Plant Science Today*. 2016; 3(2): 220–225. <https://doi.org/10.14719/pst.2016.3.2.213>
17. Bojacá G, Azevedo D, Araújo C, Fantecelle L, Silva A. Bryophyte reproduction on ironstone outcrops: Delicate plants in harsh environments. *FLORA*. 2018; 238: 155–161. <https://doi.org/10.1016/j.flora.2017.02.017>
18. Li M, He Z, Jiang L, Gu X, Jin M, Chen B, et al. Altitudinal patterns and driving factors of species diversity and phylogenetic diversity in Daiyunshan. *Acta Ecologica Sinica*. 2021; 41(3): 1148–1157. <https://doi.org/10.5846/stxb201910082091>
19. Rahman I, Hart R, Ijaz F, Afzal A, Iqbal Z, Calixto E, et al. Environmental variables drive plant species composition and distribution in the moist temperate forests of Northwestern Himalaya, Pakistan. *PLOS ONE*. 2022; 17(2): e0260687. <https://doi.org/10.1371/journal.pone.0260687> PMID: 35202409
20. Yang Y, Zhang L, Li H, He H, Wei Y, Luo J, et al. Soil physicochemical properties and vegetation structure along an elevation gradient and implications for the response of alpine plant development to climate change on the northern slopes of the Qilian Mountains. *Journal of Mountain Science*. 2018; 15(5): 1006–1019. <https://doi.org/10.1007/s11629-017-4637-z>
21. Rahbek C. The role of spatial scale and the perception of large-scale species-richness patterns. *ECOLOGICAL LETTERS*. 2005; 8(2): 224–239. <https://doi.org/10.1111/j.1461-0248.2004.00701.x>
22. Sciandrello S, Minissale P, Galdo G. Vascular plant species diversity of Mt. Etna (Sicily): endemism, insularity and spatial patterns along the altitudinal gradient of the highest active volcano in Europe. *PeerJ*. 2020; 8(e9875). <https://doi.org/10.7717/peerj.9875> PMID: 33240583
23. Zhang W, Huang D, Wang R, et al. Altitudinal Patterns of Species Diversity and Phylogenetic Diversity across Temperate Mountain Forests of Northern China. *Plos One*. 2016; 11(7):e0159995. <https://doi.org/10.1371/journal.pone.0159995> PMID: 27454311
24. Zhao M, Wang M, Zhao Y, Hu N, Wang G, Jiang M. Variations in microbial carbon metabolic activities in sedge peatlands along an altitudinal gradient in the Changbai Mountain, China. *Catena*. 2023; 220: 0341–8162. <https://doi.org/10.1016/j.catena.2022.106722>
25. Camilo R, Meléndez M, Meléndez N, López D, Ríos M. Tropical tree community composition and diversity variation along a volcanic elevation gradient. *Journal of Mountain Science*. 2022; 19: 3475–3486. <https://doi.org/10.1007/s11629-021-7034-6>
26. Haq S, Calixto E, Rashid I, Srivastava G, Khuroo A. Tree diversity, distribution and regeneration in major forest types along an extensive elevational gradient in Indian Himalaya: Implications for sustainable forest management. *Forest Ecology and Management*. 2021; 506: 0378–1127. <https://doi.org/10.1016/j.foreco.2021.119968>
27. Eyvar E, Quiel R, Leiva G, Bader M. Elevational patterns of bryophyte and lichen biomass differ among substrates in the tropical montane forest of Baru Volcano, Panama. *Journal of Bryology*. 2019; 41(2): 95–106. <https://doi.org/10.1080/03736687.2019.1584433>
28. Oishi Y. Evaluation of the Water-Storage Capacity of Bryophytes along an Altitudinal Gradient from Temperate Forests to the Alpine Zone. *Forests*. 2018; 9(7): 433. <https://doi.org/10.3390/f9070433>
29. Bergamini A, Peintinger M, Schmid B, Urmi E. Effects of management and altitude on bryophyte species diversity and composition in montane calcareous fens. *Flora*. 2001; 196(3): 180–193. [https://doi.org/10.1016/s0367-2530\(17\)30040-3](https://doi.org/10.1016/s0367-2530(17)30040-3)
30. Araújo F, Costa L, Souza J, Batista W, Silva M. Altitudinal gradient drives regional and local diversity and composition patterns of epiphyllous bryophytes in ecological refuges. *Plant Biology*. 2021; 24: 292–301. <https://doi.org/10.1111/plb.13365> PMID: 34806266
31. Liu Y, Zheng Y, A, Y. Ecological niches and interspecific associations of dominant species of bryophytes in different growing substrates. *Acta Ecologica Sinica*. 2019; 39(1): 8. <https://doi.org/10.5846/stxb201711162042>
32. Ma H, Zheng W, Shi Y, Dong Z. A preliminary study on vertical distribution characteristics of bryophytes in Sejila Mountain, southeast Tibet. *Journal of Northwest A & F University(Natural Science Edition)*. 2019; 47(5): 102–109. <https://doi.org/10.13207/j.cnki.jnwafu.2019.05.013>
33. Coelho M, Gabriel R, Hespanhol H, Borges P, Peng C. Bryophyte Diversity along an Elevational Gradient on Pico Island (Azores, Portugal). *Diversity*. 2021; 13: 162. <https://doi.org/10.3390/d13040162>
34. Grytnes J, Heegaard E, Ihlen P. Species richness of vascular plants, bryophytes, and lichens along an altitudinal gradient in western Norway. *Acta Oecologica*. 2006; 29(3): 241–246. <https://doi.org/10.1016/j.actao.2005.10.007>

35. Peng C, Petiot M, Julien B, Bardat J, Stamenoff P, Dominique S. Bryophyte diversity and distribution along an altitudinal gradient on a lava flow in La Réunion. *Diversity and Distributions*. 2007; 13(5): 654–662. <https://doi.org/10.1111/j.1472-4642.2007.00393.x>
36. Chen Y, Feng J, Niu S, Xu N, Han J, Ye Y, et al. Quantitative classification, ranking and vertical pattern of bryophyte diversity in Xiaoqinling Nature Reserve. *Acta Ecologica Sinica*. 2017; 37(8): 2653–2664. <https://doi.org/10.5846/stxb201512242568>
37. da Costa D, dos Santos N, de Rezende M, Buck W, Schäfer-Verwimp A. Bryoflora of the Itatiaia National Park along an elevation gradient: diversity and conservation. *Biodivers Conserv*. 2015; 24: 2199–2212. <https://doi.org/10.1007/s10531-015-0979-4>
38. Bruun H, Moen J, Virtanen R, Grytnes J, Oksanen L, Angerbjörn A. Effects of altitude and topography on species richness of vascular plants, bryophytes and lichens in alpine communities. *Journal of Vegetation Science*. 2006; 17(1): 37–46. [https://doi.org/10.1658/1100-9233\(2006\)017\[0037:eoato\]2.0.co;2](https://doi.org/10.1658/1100-9233(2006)017[0037:eoato]2.0.co;2)
39. Jia S, Zhang Z. Moss plant diversity and soil and water conservation in karst urban rocky deserts. *Research of Soil and Water Conservation*. 2014; 21(2): 100–105. <https://doi.org/10.13869/j.cnki.rswc.2014.02.019>
40. Cong C, Liu T, Kong X, Zhang X. Study on sphagnum moss flora and species diversity of damaged karst ecosystem in Puding, Guizhou. *Carsologica Sinica*. 2017; 36(2): 179–186. <https://doi.org/10.11932/karst20170204>
41. Li J, Jia S, Wang Z, Zhang Z. Diversity and distribution of moss plants and environmental relationships during karst rock desertification. *Ecological Science*. 2015; 34(1): 68–73. <https://doi.org/10.14108/j.cnki.1008-8873.2015.01.010>
42. Dai L, Yi W, Zan T, Peng, Tang J. Variation of bryophyte species diversity in karst desertification. *Subtropical Plant Science*. 2021; 50(4): 301–308. <https://doi.org/10.3969/j.issn.1009-7791.2021.04.009>
43. Wang W, Wang D, Wang Z, Zhang Z. Species diversity of moss plants in karst city walls of Guiyang. *Journal of Tropical and Subtropical Botany*. 2018; 26(5): 473–480. <https://doi.org/10.11926/jtsb.3890>
44. Jia S, Li J, Wang Z. Ecological functions of mosses on stone desertification slopes of karst mountain roads. *Chinese Journal of Ecology*. 2014; 33(7): 7. <https://doi.org/10.13292/j.1000-4890.20140502.001>
45. Li Y, Wang X. Study on the structure of moss plant community and its relationship with environment in Guiyang Mountain Park. *Guangdong Landscape Architecture*. 2021; 43(5): 91–96. <https://doi.org/10.12233/j.gdyl.2021.05.018>
46. Hu F. Survey of forest germplasm resources in Huaxi District, Guiyang. *Guizhou Forestry Science and Technology*. 2021; 38(4): 36–39. CNKI:SUN:GZLY.0.2010-04-012.
47. Pang J, Wang Z, Zhang Z. Study on the characteristics and succession patterns of mossy plant communities under different habitat conditions in karst dolomite desertification areas. *Ecological Science*. 2018; 37(3): 59–66. <https://doi.org/10.14108/j.cnki.1008-8873.2018.03.008>
48. Liu S, Zhu L, Jiang W, Qin J, Lee H. Research on the effects of soil Petroleum pollution concentration on the diversity of natural plant communities along the coastline of Jiaozhou Bay. *Environmental Research*, 2021; 197: 111127. <https://doi.org/10.1016/j.envres.2021.111127> PMID: 33857457
49. Jawuoro S, Koech O, Karuku G, Mbau J. Plant species composition and diversity depending on piospheres and seasonality in the southern rangelands of Kenya. *Ecol Process*. 2017; 6: 16. <https://doi.org/10.1186/s13717-017-0083-7>
50. Peng Y. Comparison of vegetation community characteristics and carbon stocks formed by fallow afforestation and abandoned cultivation and abandoned land. *Chinese Academy of Forestry*. 2017; CNKI: CDMD:2.1017.270625.
51. Song L, Li B, Chen X, Kou G. Species diversity of white sheepgrass communities under different site conditions. *Journal of Cangzhou Normal University*. 2021; 37(1): 97–101. <https://doi.org/10.13834/j.cnki.czsfxxyb.2021.01.023>
52. Xie D, Huang Q, Yi Q, Zhu Z, Zhou G, Tian L, et al. Changes in plant gradients on the continental beach of Poyang Lake wetlands. *Acta Ecologica Sinica*. 2019; 39(11): 4070–4079. <https://doi.org/10.5846/stxb201803060439>
53. Jiang Y, Zhang X, Hu R, Zhao J, Fan M, Shaaban M, et al. Urban Atmospheric Environment Quality Assessment by Naturally Growing Bryophytes in Central China. *International Journal of Environmental Research and Public Health*. 2020; 17(12): 4537. <https://doi.org/10.3390/ijerph17124537> PMID: 32599729
54. Liu M, Nan X, Zhang G, Li B, Xu L, Mu R, et al. Relationship between species diversity and functional diversity of plant communities on different slope orientations in alpine meadows. *Acta Ecologica Sinica*. 2021; 41(13): 5398–5407. <https://doi.org/10.5846/stxb202003250690>

55. Qi Q, Yan J, Zhang Q, Jiang W, Zhao J, Xu X. Species diversity of indigo *Lonicera* communities on the northern slopes of Changbai Mountain with elevation gradient. *Journal of Northeast Forestry University*. 2022; 50(3): 35–41. <https://doi.org/10.13759/j.cnki.dlxb.2022.03.009>
56. Moreira B, Villa P, Alvez-Valles C, Carvalho F. Species composition and diversity of woody communities along an elevational gradient in tropical Dwarf Cloud Forest. *Journal of Mountain Science*. 2021; 18: 1489–1503. <https://doi.org/10.1007/s11629-020-6055-x>
57. Muche M, Molla E, Rewald B, Tsegay B. Diversity and composition of farm plantation tree/shrub species along altitudinal gradients in North-eastern Ethiopia: implication for conservation. *Heliyon*. 2022; 8(3): e09048. <https://doi.org/10.1016/j.heliyon.2022.e09048> PMID: 35287324
58. Yan N, Xu J. Study on the species diversity of moss plants in Jiufeng Mountain, Inner Mongolia. *Journal of Green Science and Technology*. 2017; (11): 84–86+89. <https://doi.org/10.16663/j.cnki.lskj.2017.11.034>
59. Wu Z, Xin M, Liu Y, Xu D, Wang C. Study on the diversity and vertical distribution of moss plants in Pingdingshan, the main peak of Xiaoxinganling. *Journal of Yunnan Agricultural University (Natural Science)*. 2020; 35(2): 309–317. [https://doi.org/10.12101/j.issn.1004-390X\(n\).201906020](https://doi.org/10.12101/j.issn.1004-390X(n).201906020)
60. Yan L, Chunyan P, Shang T. Bryophyte diversity in Daba Mountain National Nature Reserve, Chongqing. *Biodiversity Science*. 2016; 24(2):4. CNKI:SUN:SWDY.0.2016-02-014.
61. Raabe S, Müller J, Manthey M, Dürhammer O, Teuber U, Göttlein A, et al. Drivers of bryophyte diversity allow implications for forest management with a focus on climate change. *Forest Ecology and Management*. 2010; 260(11): 1956–1964. <https://doi.org/10.1016/j.foreco.2010.08.042>
62. Yuan C, Chen G, Dai X, Yu D, Long H, Yang B, et al. Community structure and diversity characteristics of Yunjin *Rhododendron* in Leigongshan Reserve. *Guizhou Agricultural Sciences*. 2021; 49(11): 125–133. <https://doi.org/10.3969/j.issn.1001-3601.2021.11.019>
63. Luo F, Xin Z, Gao J, Li Y, Dong X, Duan R, et al. Plant life patterns and their altitudinal gradient characteristics in Dunhuang and Mahaishan areas. *Scientia Silvae Sinicae*. 2022; 58(3): 31–39. <https://doi.org/10.11707/j.1001-7488.20220304>
64. Cirimwami L, Doumenge C, Kahindo J, Amani C. Tropical Ecology The effect of elevation on species richness in tropical forests depends on the considered lifeform: results from an East African mountain forest. *Tropical Ecology*. 2019; 60: 473–484. <https://doi.org/10.1007/s42965-019-00050-z>
65. Spitale D, Mair P, Nascimbene J. Patterns of bryophyte life-forms are predictable across land cover types. *Ecological Indicators*. 2020; 109:105799. <https://doi.org/10.1016/j.ecolind.2019.105799>
66. González-Mancebo JM, Hernández-García CD. Bryophyte life strategies along an altitudinal gradient in El Canal y Los Tiles (La Palma, Canary Islands). *Journal of Bryology*. 1996; 19(2): 243–255. <https://doi.org/10.1179/jbr.1996.19.2.243>
67. Stehn SE, Webster CR, Glime JM, Jenkins MA. Elevational gradients of bryophyte diversity, life forms, and community assemblage in the southern Appalachian Mountains. *Canadian Journal of Forest Research*. 2010; 40(11): 2164–2174. <https://doi.org/10.1139/X10-156>
68. Pei F, Song L, Liu W, Huang J, Shi X, Yao Y, et al. Variation characteristics of epiphytic moss biomass along latitudinal and altitudinal gradients in Yunnan. *Subtropical Plant Science*. 2017; 46(1): 30–37. <https://doi.org/10.3969/j.issn.1009-7791.2017.01.006>
69. Huang X, Yao L, Wang J, Zhu Q, Wu M, Liu Y. Effects of soil nutrients on leaf functional traits of different life types of plants. *Acta Botanica Boreali-Occidentalia Sinica*. 2018; 38(12): 2293–2302. <https://doi.org/10.7606/j.issn.1000-4025.2018.12.2293>
70. Nie P, Zhang C, Long X, Li Y, Xiao W. Elevational distribution pattern of plant species diversity in Baima Xueshan Nature Reserve. *Journal of Sichuan Forestry Science and Technology*. 2022; 43(2): 95–100. <https://doi.org/10.12172/202107160001>
71. Li Z, Wu Q, Wang Z, Zhang Z. Distribution of bryophyte diversity and its ecological characteristics in the peak bush of Guiyang in the context of karst cities. *Bulletin of Botanical Research*. 2018; 38(3): 433–443. <https://doi.org/10.7525/j.issn.1673-5102.2018.03.016>
72. Nunes C, Braga R, Figueira J, Neves F, Fernandes G. Dung Beetles along a Tropical Altitudinal Gradient: Environmental Filtering on Taxonomic and Functional Diversity. *PLOS ONE*. 2016; 11(6): e0157442. <https://doi.org/10.1371/journal.pone.0157442> PMID: 27336589
73. Wang Z, Ruan Y, Wang W, Chen J, Zhao W, Chen H, et al. Effects of different gradients of nitrogen, phosphorus and potassium application on the structure and diversity of soil bacterial communities of tobacco plantation in Yunnan. *Southwest China Journal of Agricultural Sciences*. 2022; 35(4): 764–771. <https://doi.org/10.16213/j.cnki.scjas.2022.4.005>
74. Zhang X, Zhou J, Cai W, Guan T, Gao N, Du H, et al. Diversity characteristics of desert plant communities in the Heihe River Basin under water gradient. *Acta Ecologica Sinica*. 2017; 37(14): 4627–4635. <https://doi.org/10.5846/stxb201604080643>

75. Dar A, Jamal K, Alhazmi A, El-Sharnouby M, Salah M, Sayed S. Moth diversity, species composition, and distributional pattern in Aravalli Hill Range of Rajasthan, India. *Saudi Journal of Biological Sciences*. 2021; 28(9): 4884–4890. <https://doi.org/10.1016/j.sjbs.2021.06.018> PMID: 34466062
76. Li F, Wang Y, Liu L, Yang S. Species diversity of moss plants in West Tianmu Mountain, Zhejiang. *Chinese Journal of Applied Ecology*. 2006; (02): 192–196. <https://doi.org/10.3321/j.issn:1001-9332.2006.02.006>
77. Guo Y, Lei P, Yan Y, Yuan R, Wu S, Li J. Changes in plant species diversity along an altitudinal gradient in the northwest slope of Huanggang Mountain, Wuyi Mountain, Jiangxi. *Chinese Journal of Ecology*. 2015; 34(11): 3002–3008. <https://doi.org/10.13292/j.1000-4890.2015.0290>
78. Hernández-Hernández R, Kluge J, Ah-Peng C, González-Mancebo J. Natural and human-impacted diversity of bryophytes along an elevational gradient on an oceanic island (La Palma, Canarias). *Plos One*. 2019; 14(4): e0213823. <https://doi.org/10.1371/journal.pone.0213823> PMID: 30943204
79. Zhou X, Wen Y, Wang L, Sun D, Ming A, Jia H, et al. Changes in understory vegetation and plant diversity in different restored forest stands in karst stone desertification. *Guangxi Sciences*. 2022; 29(01): 71–87. <https://doi.org/10.13656/j.cnki.gxkx.20220311.006>
80. Ma H, Zheng W, Shao X, Wang Y, Shi Y. Preliminary study on the diversity of terrestrial bryophytes in the Sedi La Mountains (Eastern Slope), Tibet. *Journal of Yunnan Agricultural University (Natural Science)*. 2018; 33(2): 184–190. [https://doi.org/10.12101/j.issn.1004-390X\(n\).201704033](https://doi.org/10.12101/j.issn.1004-390X(n).201704033)
81. Quilodrán C, Sandvig E, Aguirre F, Aguilar J, Barroso O, Vásquez R, et al. The extreme rainfall gradient of the Cape Horn Biosphere Reserve and its impact on forest bird richness. *Biodivers Conserv*. 2022; 31: 613–627. <https://doi.org/10.1007/s10531-022-02353-5> PMID: 35529023
82. Härdtle W, Oheimb G, Westphal C. The effects of light and soil conditions on the species richness of the ground vegetation of deciduous forests in northern Germany (Schleswig-Holstein). *Forest Ecology and Management*. 2003; 182(1–3): 327–338. [https://doi.org/10.1016/s0378-1127\(03\)00091-4](https://doi.org/10.1016/s0378-1127(03)00091-4)
83. Peres C, Tonetto A, Garey M, Branco C. Canopy cover as the key factor for occurrence and species richness of subtropical stream green algae (Chlorophyta). *Aquatic Botany*. 2017; 137: 24–29. <https://doi.org/10.1016/j.aquabot.2016.11.004>
84. References: Oishi Y, Hiura T. Bryophytes as bioindicators of the atmospheric environment in urban-forest landscapes. *Landscape and Urban Planning*. 2017; 167: 348–355. <https://doi.org/10.1016/j.landurbplan.2017.07.010>
